# Supplementary material
Source: publisher figshare collection journal article supplement (https://frontiersin.figshare.com/ndownloader/files/30967936)
Supplement: Supplementary file 1 [file 30967936]

## Supplementary Material

### 1 Supplementary Figures

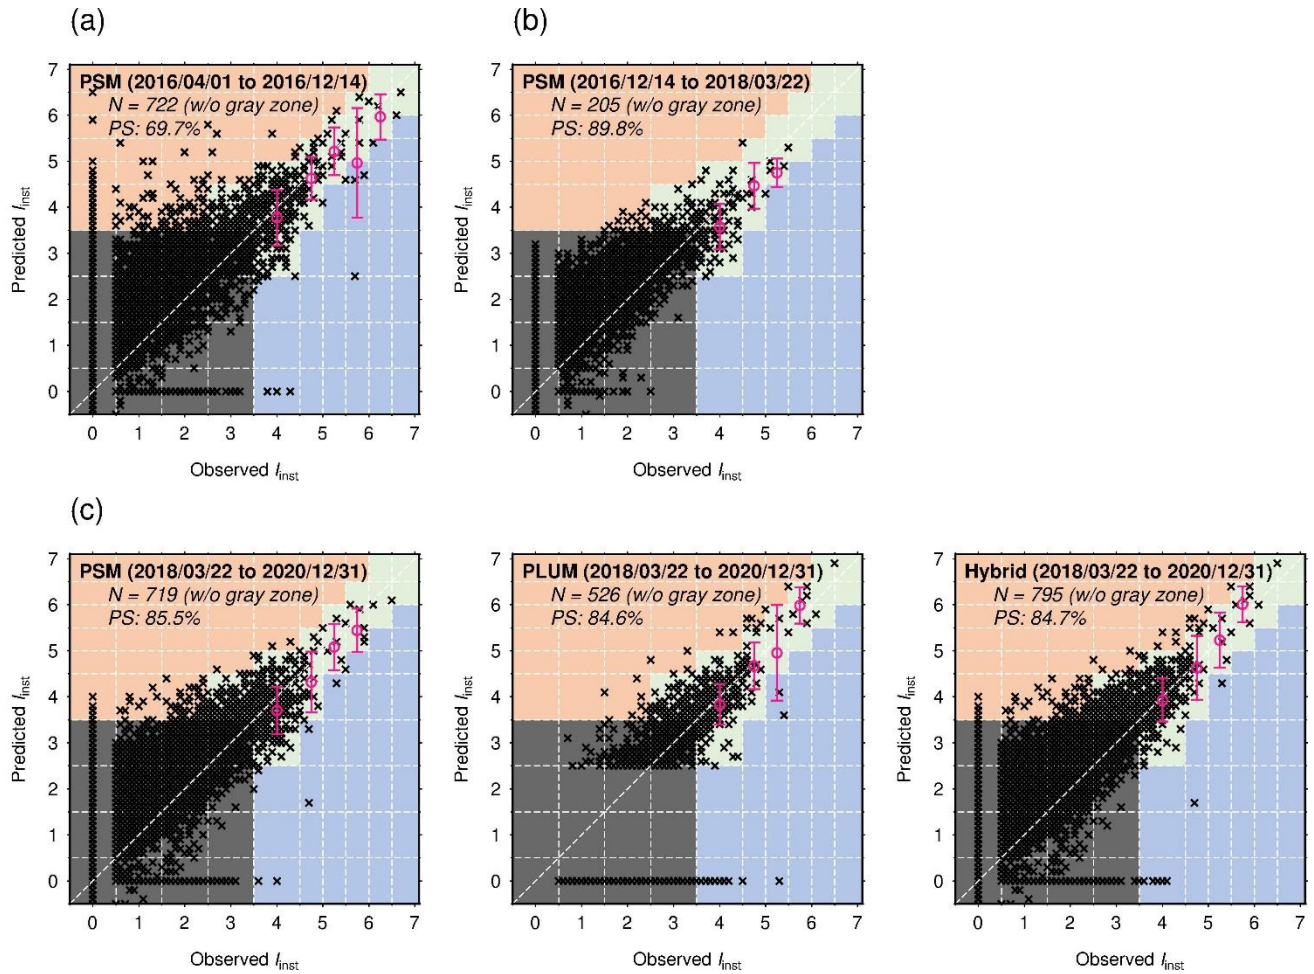

**Supplementary Figure 1.** The same figure as Fig. 3 but without the M4.5 and M4.0 events in January 2018 and the M6.0 earthquake near the Torishima island in July 2020.

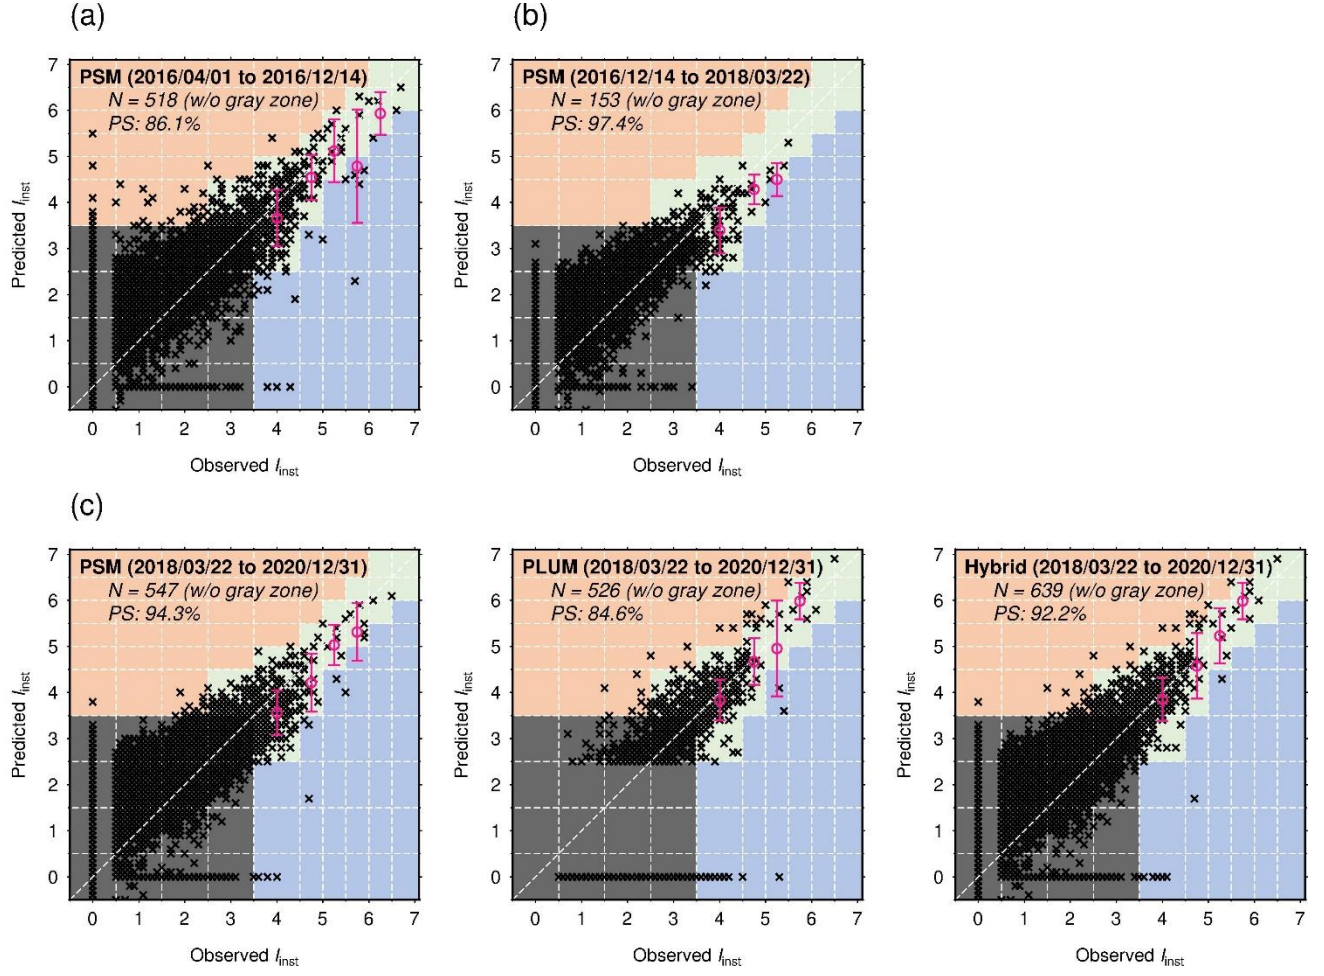

**Supplementary Figure 2.** The same figure as Fig. 4 but without the M4.5 and M4.0 events in January 2018 and the M6.0 earthquake near the Torishima island in July 2020.
